# Supplementary material for: Identification of rare DNA sequence variants in high-risk autism families and their prevalence in a large case/control population
Source: PubMed Central journal article supplement (PMC4098669; doi:10.1186/2040-2392-5-5), 2014-01-27

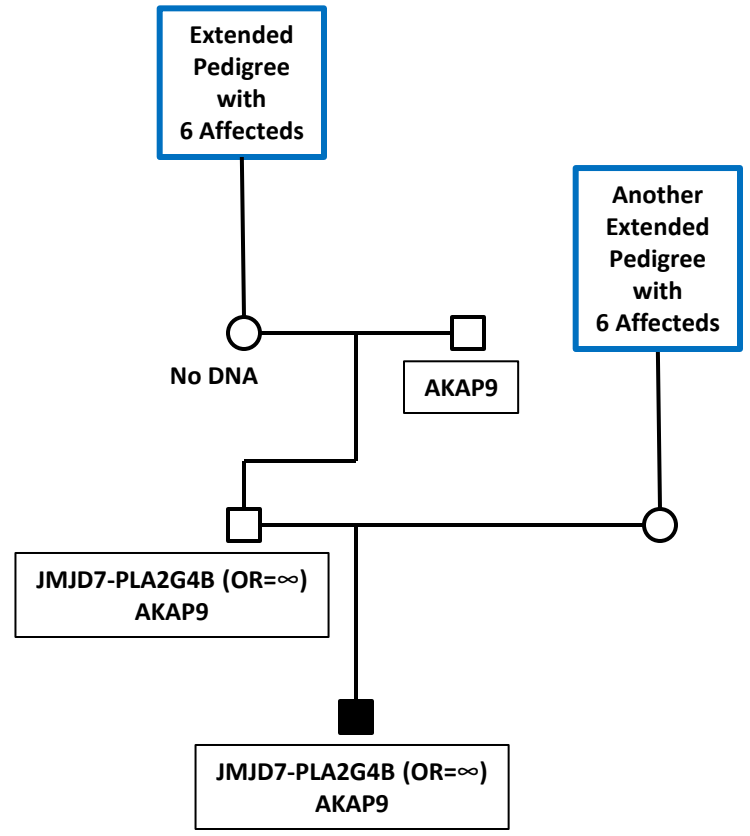

Supplement: 2040-2392-5-5-S4.pdf [file 2040-2392-5-5-S4.pdf]
